# Supplementary material for: Skin-conformal MXene-doped wearable sensors with self-adhesive, dual-mode sensing, and high sensitivity for human motions and wireless monitoring
Source: Royal Society of Chemistry journal article supplement (doi:10.1039/d1tb01769a), 2021-01-01
Supplement: d1tb01769a1.pdf [file d1tb01769a1.pdf]

## Supporting Information for Skin-conformal MXene-doped wearable sensors with self-adhesive, dual-mode sensing, and high sensitivity for human motions and wireless monitoring †

Yuegang Sun,<sup>a, b ‡</sup> Shuang Wang,<sup>a, b ‡</sup> Xiaosheng Du,<sup>a, b</sup> Zongliang Du,<sup>a, b</sup> Xu Cheng,<sup>a, b \*</sup> and Haibo Wang,<sup>a, b \*</sup>

<sup>a</sup>College of Biomass Science and Engineering, Sichuan University, Chengdu 610065, PR China. Tel: +86-28-85401296.

<sup>b</sup>The Key Laboratory of Leather Chemistry and Engineering of Ministry of Education, Sichuan University, Chengdu 610065, PR China.

\*Correspondence to: H. Wang (E-mail: whb6985@scu.edu.cn), X. Cheng (scuchx@163.com).

‡These authors contributed equally to this paper.

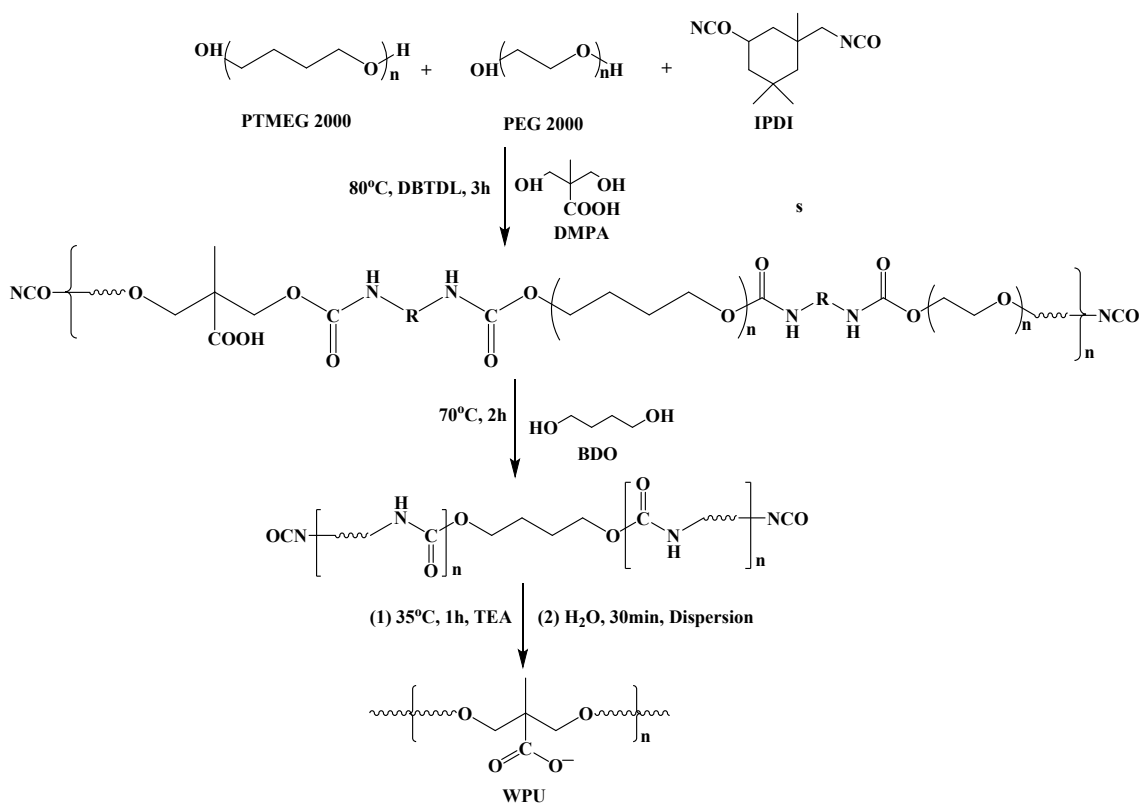

Scheme S1. Synthetic route to WPU.

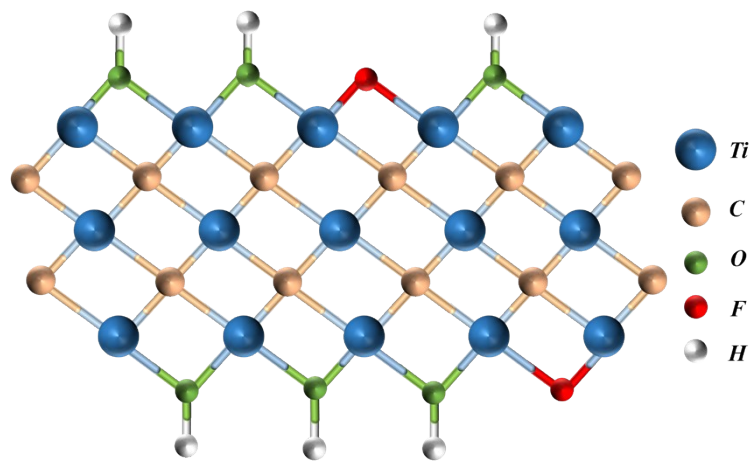

**Fig. S1.** The molecular structure of MXene nanosheet
